# Supplementary material for: Above and below ground carbohydrate allocation differs between ash (Fraxinus excelsior L.) and beech (Fagus sylvatica L.)
Source: PubMed Central journal article supplement (PMC5608211; doi:10.1371/journal.pone.0184247), 2017-09-21
Supplement: pone.0184247.s001.pdf [file pone.0184247.s001.pdf]

| time | beech su. leaf | beech suc. branch | beech suc. stem top | beech suc. stem bottom | beech suc. roots | ash suc. leaf | ash suc. branch | ash suc. stem top |
|------|----------------|-------------------|---------------------|------------------------|------------------|---------------|-----------------|-------------------|
| 1    | 34.41          | 8.97              | 15.49               | 10.43                  | 0.23             | 0.96          | 0.20            | 0.88              |
| 1    | 23.77          | 7.78              | 14.91               | 15.60                  | 2.85             | 1.45          | 0.58            | 0.85              |
| 1    | 48.63          | 15.28             | 25.13               | 17.63                  | 1.66             | 2.56          | 2.80            | 2.29              |
| 1    | 41.32          | 13.22             | 22.32               | 9.17                   | 0.73             | 4.69          | 2.96            | 3.95              |
| 5    | 6.37           | 2.96              | 6.61                | 3.76                   | 0.03             | 0.74          | 5.27            | 0.68              |
| 5    | 8.50           | 8.32              | 6.91                | 5.36                   | 0.36             | 0.61          | 2.70            | 6.28              |
| 5    | 3.29           | 3.46              | 3.80                | 3.58                   | 0.03             | 0.94          | 3.29            | 9.35              |
| 5    | 2.10           | 5.97              | 7.02                | 2.65                   | 0.06             | 1.39          | 2.77            | 1.92              |
| 10   | 1.31           | 0.25              | 0.25                | 0.34                   | 0.07             | 0.41          | 1.28            | 1.39              |
| 10   | 0.47           | 1.25              | 0.36                | 0.96                   | 0.12             | 1.26          | 0.27            | 1.85              |
| 10   | 0.79           | 2.62              | 2.66                | 1.66                   | 0.49             | 0.15          | 1.70            | 2.24              |
| 10   | 2.13           | 0.50              | 1.31                | 1.46                   | 0.01             | 0.21          | 1.15            | 1.46              |
| 20   | 0.88           | 1.72              | 1.65                | 1.52                   | 0.01             | 0.10          | 0.24            | 0.46              |
| 20   | 0.23           | 3.83              | 1.71                | 2.72                   | 0.65             | 0.05          | 0.89            | 0.25              |
| 20   | 0.27           | 1.26              | 1.51                | 0.86                   | 0.11             | 0.10          | 1.09            | 1.61              |
| 20   | 0.35           | 1.72              | 1.64                | 2.29                   | 0.11             | 0.08          | 0.38            | 0.28              |
| 60   | 0.06           | 0.42              | 0.04                | 0.05                   | 0.04             | 0.04          | 0.13            | 0.09              |
| 60   | 0.09           | 0.49              | 0.07                | 0.34                   | 0.07             | 0.05          | 0.32            | 0.21              |
| 60   | 0.13           | 0.26              | 0.15                | 0.15                   | 0.05             | 0.03          | 0.13            | 0.14              |
| 60   | 0.37           | 0.19              | 0.32                | 0.43                   | 0.09             | 0.05          | 0.25            | 0.06              |

| time | ash suc. stem bottom | ash suc. root | ash RFO leaf | ash RFO branch | ash RFO stem top | ash RFO stem bottom | ash RFO root |
|------|----------------------|---------------|--------------|----------------|------------------|---------------------|--------------|
| 1    | 0.36                 | 0.18          | 2.27         | 0.53           | 5.37             | 5.54                | 1.46         |
| 1    | 0.23                 | 0.03          | 3.81         | 3.56           | 6.41             | 5.06                | 0.16         |
| 1    | 0.79                 | 0.48          | 5.76         | 4.35           | 14.18            | 5.80                | 4.61         |
| 1    | 1.31                 | 0.01          | 6.16         | 8.84           | 27.87            | 10.13               | 0.02         |
| 5    | 0.33                 | 0.40          | 0.56         | 6.41           | 0.41             | 1.50                | 0.77         |
| 5    | 0.95                 | 0.05          | 1.17         | 1.80           | 2.58             | 0.66                | 0.01         |
| 5    | 0.63                 | 0.50          | 0.56         | 1.32           | 7.32             | 1.33                | 3.25         |
| 5    | 1.11                 | 0.12          | 1.95         | 0.70           | 0.65             | 1.12                | 0.05         |
| 10   | 1.15                 | 0.90          | 0.32         | 0.54           | 1.01             | 1.48                | 2.15         |
| 10   | 1.46                 | 0.61          | 0.44         | 0.14           | 0.86             | 1.38                | 1.02         |
| 10   | 0.99                 | 0.09          | 0.22         | 0.49           | 0.89             | 1.13                | 0.08         |
| 10   | 0.45                 | 0.31          | 0.18         | 1.70           | 1.45             | 1.68                | 0.38         |
| 20   | 0.88                 | 0.22          | 0.09         | 0.13           | 0.30             | 0.72                | 1.52         |
| 20   | 0.53                 | 0.01          | 0.19         | 0.65           | 0.12             | 0.76                | 0.02         |
| 20   | 0.90                 | 0.07          | 0.25         | 0.66           | 0.49             | 0.73                | 1.65         |
| 20   | 0.26                 | 0.24          | 0.07         | 0.41           | 0.28             | 0.74                | 3.31         |
| 60   | 0.10                 | 0.01          | 0.11         | 0.18           | 0.13             | 0.40                | 0.18         |
| 60   | 0.13                 | 0.00          | 0.16         | 0.66           | 0.21             | 0.76                | 0.01         |
| 60   | 0.11                 | 0.13          | 0.06         | 0.24           | 0.38             | 1.54                | 0.80         |
| 60   | 0.13                 | 0.01          | 7.90         | 0.25           | 0.13             | 0.59                | 0.24         |
