# Supplementary material for: Above and below ground carbohydrate allocation differs between ash (Fraxinus excelsior L.) and beech (Fagus sylvatica L.)
Source: PubMed Central journal article supplement (PMC5608211; doi:10.1371/journal.pone.0184247), 2017-09-21
Supplement: pone.0184247.s002.pdf [file pone.0184247.s002.pdf]

| time | beech su. leaf | beech suc. stem bottom | beech suc. roots | ash su. leaf | ash suc. stem bottom |
|------|----------------|------------------------|------------------|--------------|----------------------|
| 1    | 25.18          | 1.90                   | 3.66             | 1.73         | 0.62                 |
| 1    | 21.94          | 3.21                   | 2.76             | 1.75         | 1.55                 |
| 1    | 21.67          | 3.19                   | 3.43             | 1.77         | 1.07                 |
| 1    | 21.98          | 2.54                   | 2.52             | 4.48         | 1.90                 |
| 5    | 28.55          | 3.79                   | 3.70             | 0.92         | 0.41                 |
| 5    | 22.81          | 3.74                   | 3.39             | 2.39         | 0.79                 |
| 5    | 25.68          | 3.69                   | 3.50             | 4.76         | 0.47                 |
| 5    | 13.54          | 2.68                   | 2.34             | 5.85         | 0.82                 |
| 10   | 9.75           | 4.69                   | 1.48             | 4.95         | 1.57                 |
| 10   | 11.85          | 4.53                   | 2.86             | 8.21         | 1.34                 |
| 10   | 12.88          | 3.93                   | 4.03             | 3.45         | 0.90                 |
| 10   | 29.07          | 4.08                   | 2.03             | 3.41         | 0.91                 |
| 20   | 17.10          | 6.83                   | 2.87             | 4.62         | 1.79                 |
| 20   | 9.24           | 6.31                   | 5.38             | 4.44         | 1.81                 |
| 20   | 18.90          | 6.05                   | 2.82             | 4.21         | 2.99                 |
| 20   | 6.93           | 5.93                   | 3.45             | 2.19         | 0.67                 |
| 60   | 32.76          | 5.81                   | 3.70             | 6.81         | 0.95                 |
| 60   | 30.88          | 6.42                   | 5.04             | 7.96         | 1.67                 |
| 60   | 36.11          | 7.51                   | 4.90             | 2.69         | 0.90                 |
| 60   | 31.54          | 7.66                   | 4.58             | 7.16         | 1.44                 |

| time | ash suc. roots | ash RFO leaf | ash RFO stem bottom | ash RFO roots |
|------|----------------|--------------|---------------------|---------------|
| 1    | 3.09           | 2.84         | 1.45                | 3.56          |
| 1    | 3.18           | 3.60         | 4.83                | 3.22          |
| 1    | 2.59           | 2.80         | 1.82                | 7.76          |
| 1    | 2.23           | 9.33         | 6.35                | 2.54          |
| 5    | 2.83           | 1.29         | 1.02                | 2.95          |
| 5    | 5.66           | 7.31         | 0.87                | 1.41          |
| 5    | 2.21           | 4.34         | 1.18                | 4.83          |
| 5    | 5.60           | 6.26         | 1.48                | 1.38          |
| 10   | 1.38           | 7.84         | 4.32                | 8.83          |
| 10   | 3.92           | 7.93         | 3.22                | 5.69          |
| 10   | 5.58           | 8.00         | 2.83                | 2.10          |
| 10   | 5.10           | 6.70         | 5.82                | 1.92          |
| 20   | 1.80           | 5.59         | 3.11                | 10.80         |
| 20   | 0.15           | 9.26         | 5.57                | 21.12         |
| 20   | 1.37           | 9.31         | 4.94                | 15.46         |
| 20   | 1.59           | 1.09         | 2.19                | 16.28         |
| 60   | 4.47           | 10.20        | 5.09                | 7.13          |
| 60   | 2.06           | 12.01        | 11.79               | 3.69          |
| 60   | 1.01           | 3.46         | 12.59               | 8.19          |
| 60   | 2.06           | 14.65        | 12.27               | 4.18          |
